# Supplementary material
Source: PubMed Central journal article supplement (PMC7001890)
Supplement: NIHMS1533128-supplement-1.pdf [file NIHMS1533128-supplement-1.pdf]

**Cell, Volume 178**

## **Supplemental Information**

### **A Paranigral VTA Nociceptin Circuit that Constrains Motivation for Reward**

**Kyle E. Parker, Christian E. Pedersen, Adrian M. Gomez, Skylar M. Spangler, Marie C. Walicki, Shelley Y. Feng, Sarah L. Stewart, James M. Otis, Ream Al-Hasani, Jordan G. McCall, Kristina Sakers, Dionnet L. Bhatti, Bryan A. Copits, Robert W. Gereau, Thomas Jhou, Thomas J. Kash, Joseph D. Dougherty, Garret D. Stuber, and Michael R. Bruchas**

**Table S1. Related to STAR Methods Section: Stereotaxic viral / optical fiber implant surgeries. List of viruses used in stereotaxic surgery**

| <b>Virus</b>                                                                | <b>Amount</b> | <b>Coordinates</b>              | <b>Source</b>                                                   |
|-----------------------------------------------------------------------------|---------------|---------------------------------|-----------------------------------------------------------------|
| AAV5-EF1 $\alpha$ -DIO-hChR2-(H134R)-eYFP                                   | 500 nL        | AP -3.4, ML 0.0, DV -4.75       | The Hope Center Viral Core – Washington University at St. Louis |
| AAV5-EF1 $\alpha$ -DIO-eNpHR3.0-eYFP                                        | 500 nL        | AP -3.4, ML 0.0, DV -4.75       | UNC Vector Core                                                 |
| AAV1-EF1 $\alpha$ -DIO-TVA-mCherry: AAV1-EF1 $\alpha$ -DIO-RG (1:1 mixture) | 350 nL        | AP -3.2, ML $\pm$ 0.5, DV -4.8  | UNC Vector Core                                                 |
| $\Delta$ G-rabies-GFP                                                       | 350 nL        | AP -3.2, ML $\pm$ 0.5, DV -4.8  | Salk Institute                                                  |
| AAV2-FLEX-taCasp3-TEVp                                                      | 500 nL        | AP -3.4, ML 0.0, DV -4.8        | UNC Vector Core                                                 |
| AAV5-hSyn-DIO-hM3Dq-mCherry                                                 | 500 nL        | AP -3.4, ML 0.0, DV -4.8        | Addgene                                                         |
| AAV5-hSyn-DIO-hM4Di-mCherry                                                 | 500 nL        | AP -3.4, ML 0.0, DV -4.8        | Addgene                                                         |
| AAV5-EF1 $\alpha$ -DIO-NOPR-eYFP                                            | 300 nL        | AP -3.15, ML $\pm$ 0.5, DV -4.8 | Bruchas Lab                                                     |
| AAV5-PGK-Cre                                                                | 300 nL        | AP -3.15, ML $\pm$ 0.5, DV -4.8 | UNC Vector Core                                                 |
| AAV9-rTH-PI-Cre-SV40                                                        | 300 nL        | AP -3.15, ML $\pm$ 0.5, DV -4.8 | Addgene, Penn Vector Core                                       |
| retroAAV2-EF1 $\alpha$ -DIO-hChR2-(H134R)-eYFP                              | 100 nL        | AP -3.15, ML $\pm$ 0.5, DV -4.8 | The Hope Center Viral Core – Washington University at St. Louis |
| AAV-DJ-EF1 $\alpha$ -DIO-GCaMP6f                                            | 470 nL        | AP -3.4, ML $\pm$ 0.4 DV -4.8   | Stanford University Gene Vector and Viral Core                  |
| AAV8-bacTRAP                                                                | 500 nL        | AP -3.4, ML 0.0, DV -4.75       | UNC Vector Core                                                 |

**Table S2. Related to Figure 4: pnVTA<sup>Pnoc</sup> TRAP: Genes of Interest**

| Gene Symbol | Gene Name                                                              | Class                | log <sub>2</sub> (CPM) |
|-------------|------------------------------------------------------------------------|----------------------|------------------------|
| Pnoc        | Prepronociceptin                                                       | Neuropeptide         | 3.989                  |
| PDYN        | Preprodynorphin                                                        | Neuropeptide         | 1.778                  |
| PENK        | Preproenkephalin                                                       | Neuropeptide         | 1.178                  |
| NPY         | Neuropeptide Y                                                         | Neuropeptide         | 0.189                  |
| CARTPT      | Cocaine and amphetamine regulated transcript                           | Neuropeptide         | -0.176                 |
| SST         | Somatostatin                                                           | Neuropeptide         | -1.607                 |
| CCK         | Cholecystokinin                                                        | Neuropeptide         | -2.16                  |
| POMC        | Proopiomelanocortin                                                    | Neuropeptide         | -3.339                 |
| Slc6a3      | Dopamine Transporter; dopamine marker                                  | Channel/Transporter  | 3.539                  |
| VAT1        | vesicle amine transport protein 1 homolog (T californica)              | Channel/Transporter  | 3.142                  |
| Slc17a6     | Vglut2; solute carrier family 17 member 6                              | Channel/Transporter  | 2.82                   |
| Cacna2d1    | calcium channel, voltage-dependent, alpha2/delta subunit 1             | Channel/Transporter  | 2.614                  |
| Slc17a8     | Vglut3; solute carrier family 17 member 8                              | Channel/Transporter  | -0.023                 |
| Slc18a2     | solute carrier family 18 (vesicular monoamine transporter 2), member 2 | Channel/Transporter  | -0.092                 |
| Slc17a7     | Vglut1; solute carrier family 17 member 7                              | Channel/Transporter  | -1.74                  |
| Hcrtr1      | Hypocretin(orexin) receptor 1                                          | Receptor             | 6.067                  |
| Ntsr1       | Neurotensin receptor 1                                                 | Receptor             | 5.324                  |
| Gabrq       | Gamma-aminobutyric acid (GABA) A receptor, subunit theta               | Receptor             | 4.464                  |
| Htr7        | 5-hydroxytryptamine (serotonin) receptor 7                             | Receptor             | 2.958                  |
| Oprm1       | Mu opioid receptor 1                                                   | Receptor             | 2.275                  |
| NPY1R       | Neuropeptide Y receptor 1                                              | Receptor             | 1.454                  |
| Oprk1       | Kappa opioid receptor 1                                                | Receptor             | 1.295                  |
| Htr1a       | 5-hydroxytryptamine (serotonin) receptor 1A                            | Receptor             | 1.263                  |
| Chrna4      | cholinergic receptor, nicotinic, alpha polypeptide 4                   | Receptor             | -0.087                 |
| Htr2c       | 5-hydroxytryptamine (serotonin) receptor 2C                            | Receptor             | -0.526                 |
| Htr2a       | 5-hydroxytryptamine (serotonin) receptor 2A                            | Receptor             | -0.873                 |
| Htr4        | 5-hydroxytryptamine (serotonin) receptor 4                             | Receptor             | -1.206                 |
| Oprl1       | opiod receptor like 1                                                  | Receptor             | -1.289                 |
| Chrna5      | cholinergic receptor, nicotinic, alpha polypeptide 5                   | Receptor             | -2.752                 |
| Chrna7      | cholinergic receptor, nicotinic, alpha polypeptide 7                   | Receptor             | -2.752                 |
| Chrna3      | cholinergic receptor, nicotinic, alpha polypeptide 3                   | Receptor             | -3.407                 |
| Htr5A       | 5-hydroxytryptamine (serotonin) receptor 5A                            | Receptor             | -3.635                 |
| FEV         | Fifth Ewing Variant Protein                                            | Transcription factor | 3.946                  |
| GAD1        | glutamic acid decarboxylase 1                                          | Other                | 1.013                  |
| GAD2        | glutamic acid decarboxylase 2                                          | Other                | -0.275                 |
| TH          | Tyrosine hydroxylase; dopamine marker                                  | Other                | -0.767                 |
| Aldh1L1     | Aldehyde Dehydrogenase 1 Family Member L1 (astrocyte marker)           | Other                | -3.137                 |
| Ache        | Acetylcholinesterase                                                   | Other                | -3.329                 |
| Gfap        | glial fibrillary acidic protein (astrocyte marker)                     | Other                | -4.026                 |
| FA2H        | fatty acid 2-hydroxylase (oligodendrocyte marker)                      | Other                | -5.502                 |
