# Supplementary material
Source: PubMed Central journal article supplement (PMC7001890)

### A Pnoc-IRES-Cre Knockin Targeting Vector

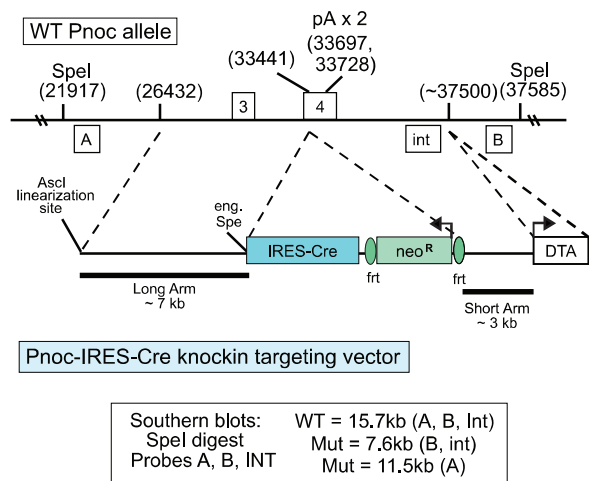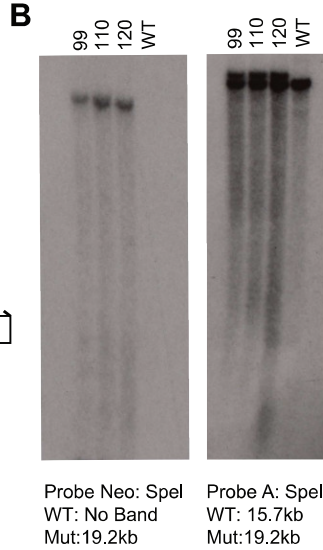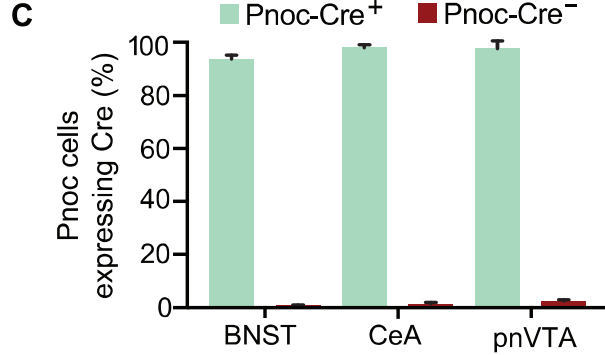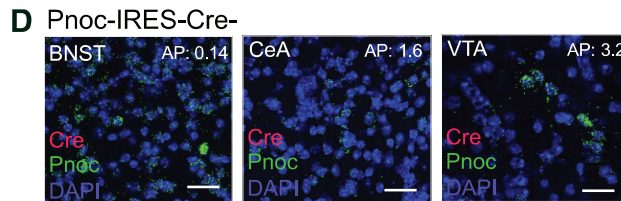

### Characterization of Pnoc-expressing brain regions

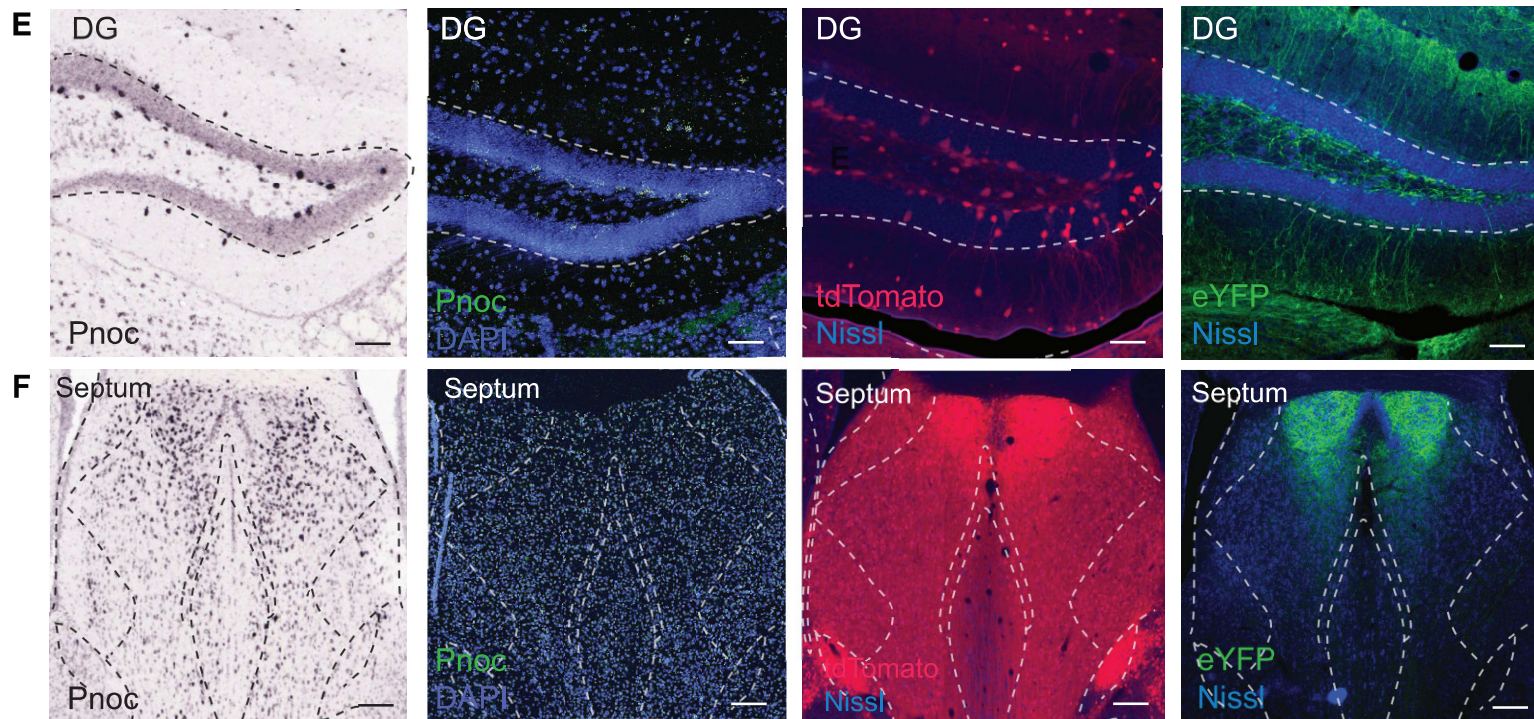

### G Mapping of Pnoc-expressing VTA Rabies → DAT-Cre

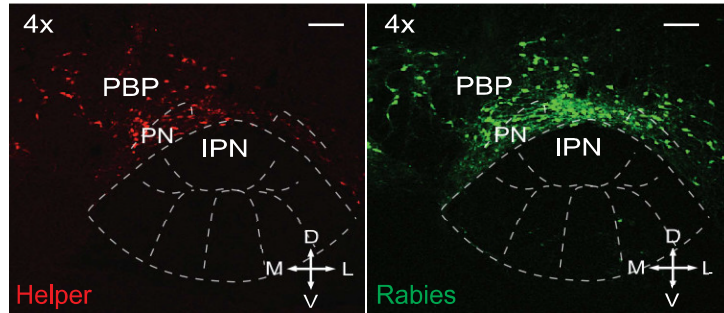

### H In situ hybridization Identification Rabies → Pnoc

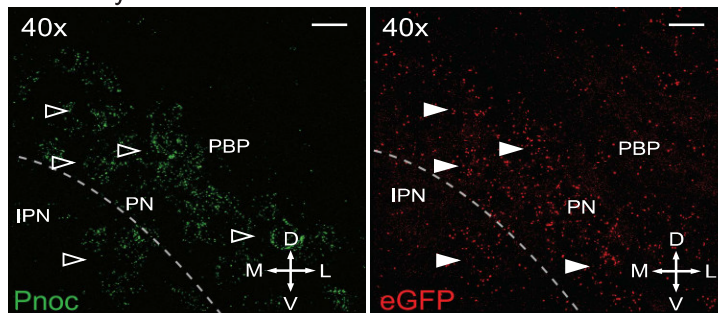

### I Pnoc-IRES-Cre::VTA retroAAV2-DIO-hChR2-eYFP

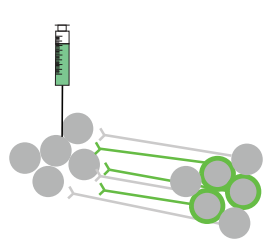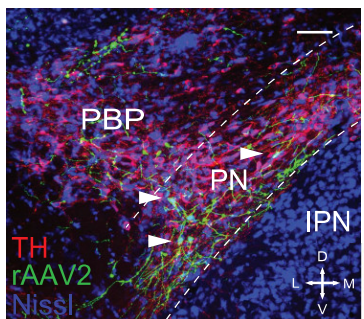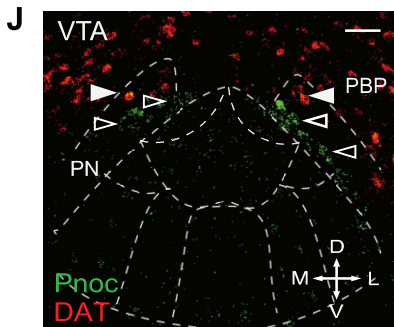

### K Pnoc<sup>+</sup> / DAT<sup>-</sup> Pnoc<sup>+</sup> / DAT<sup>+</sup>

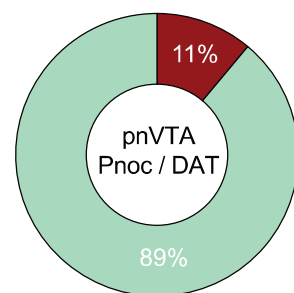

Supplement: NIHMS1533128-supplement-3.pdf [file NIHMS1533128-supplement-3.pdf]
