# Supplementary material
Source: PubMed Central journal article supplement (PMC7001890)

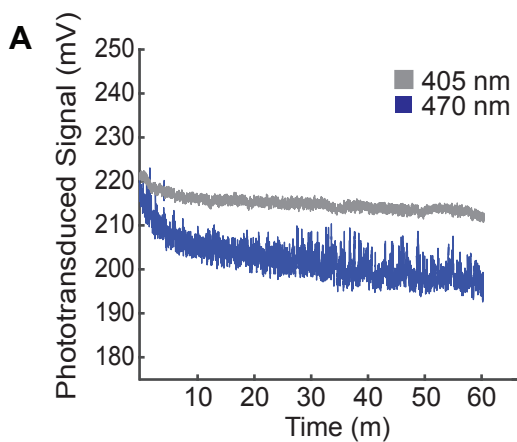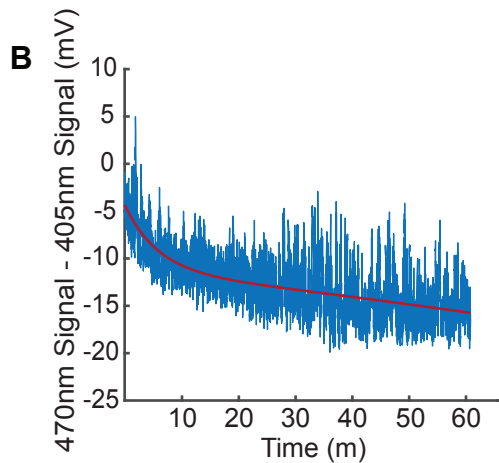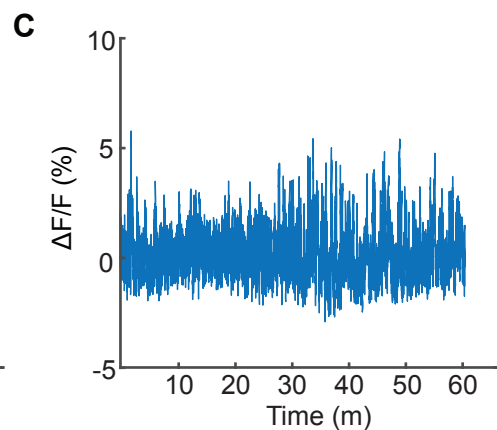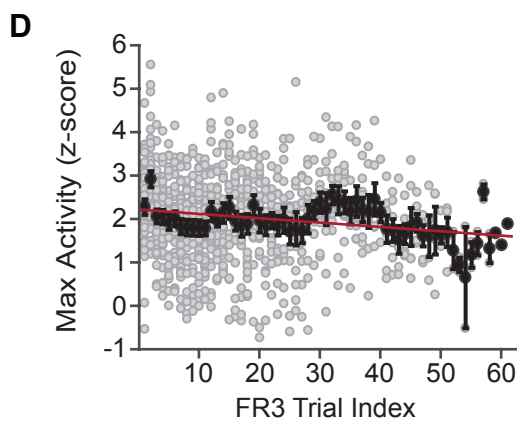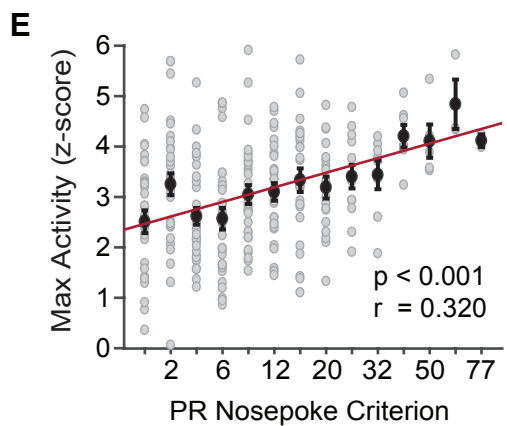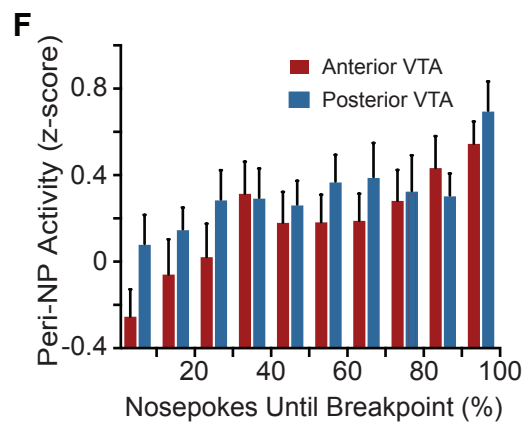

Supplement: NIHMS1533128-supplement-4.pdf [file NIHMS1533128-supplement-4.pdf]

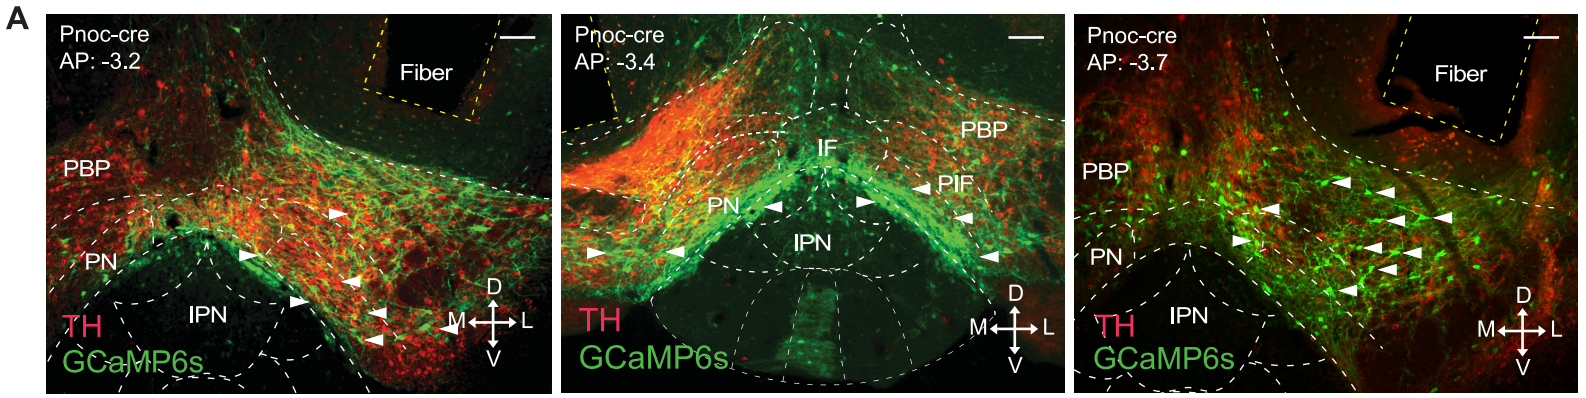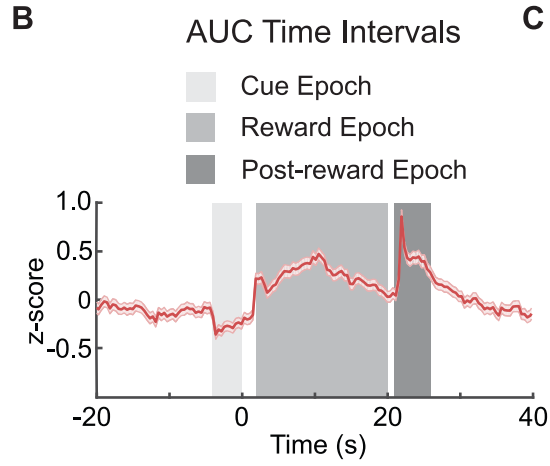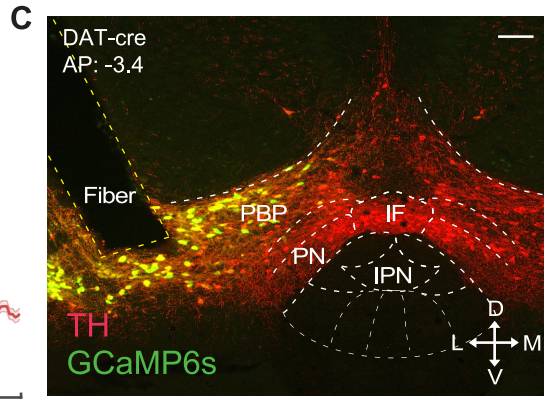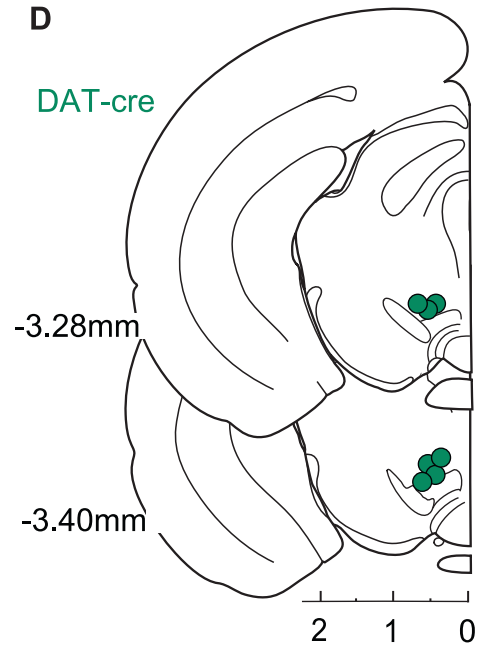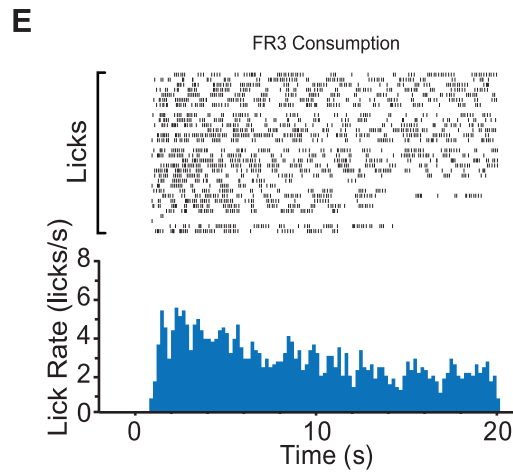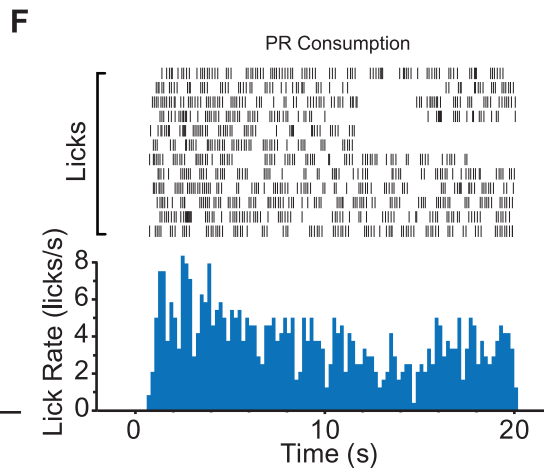

Supplement: NIHMS1533128-supplement-5.pdf [file NIHMS1533128-supplement-5.pdf]

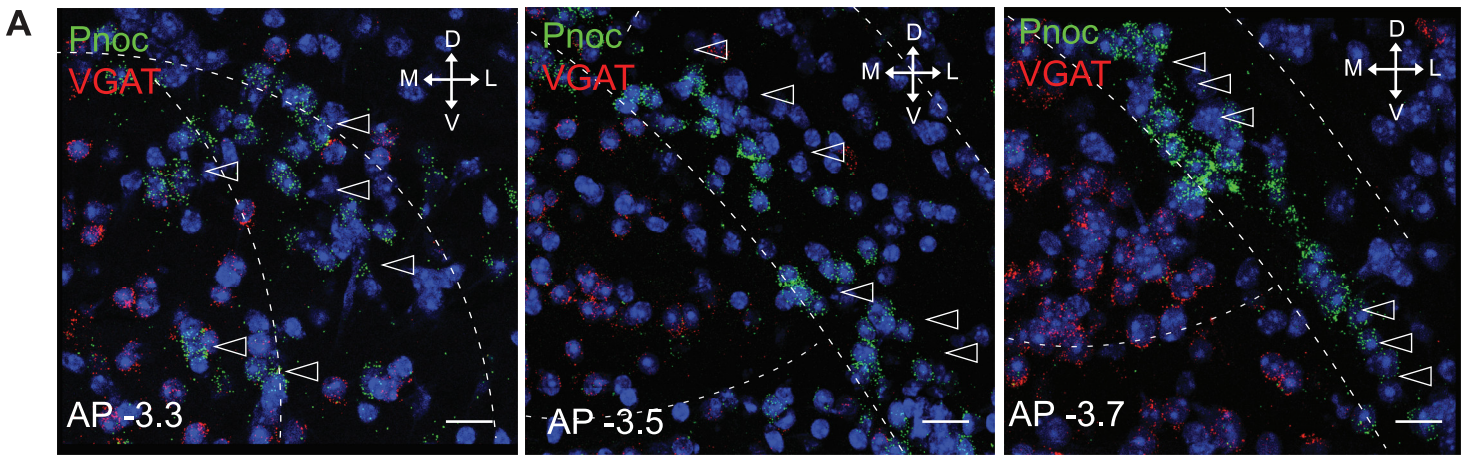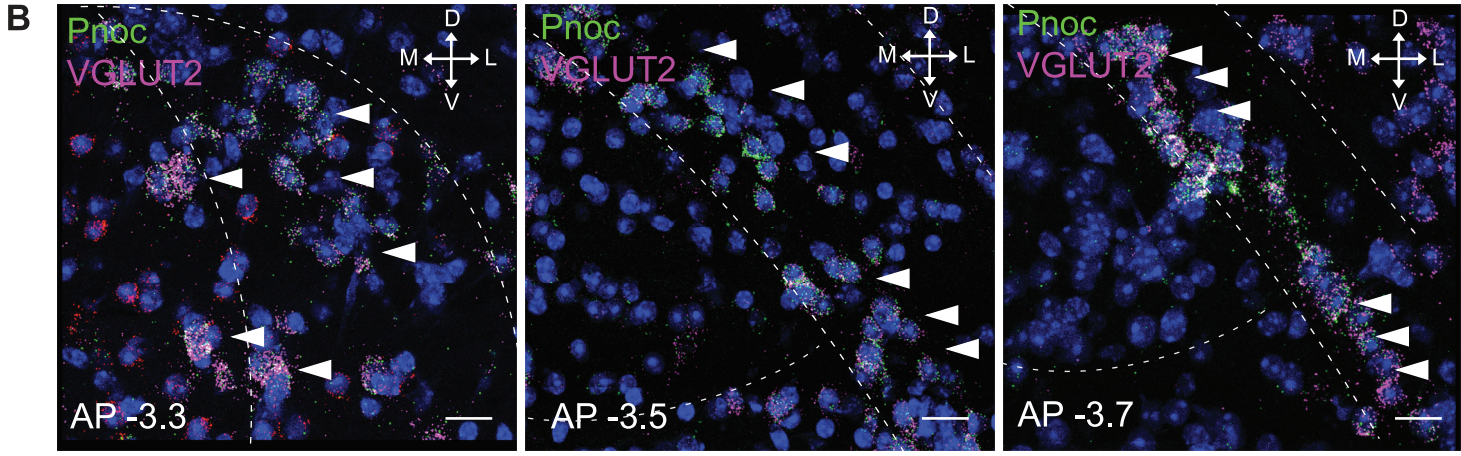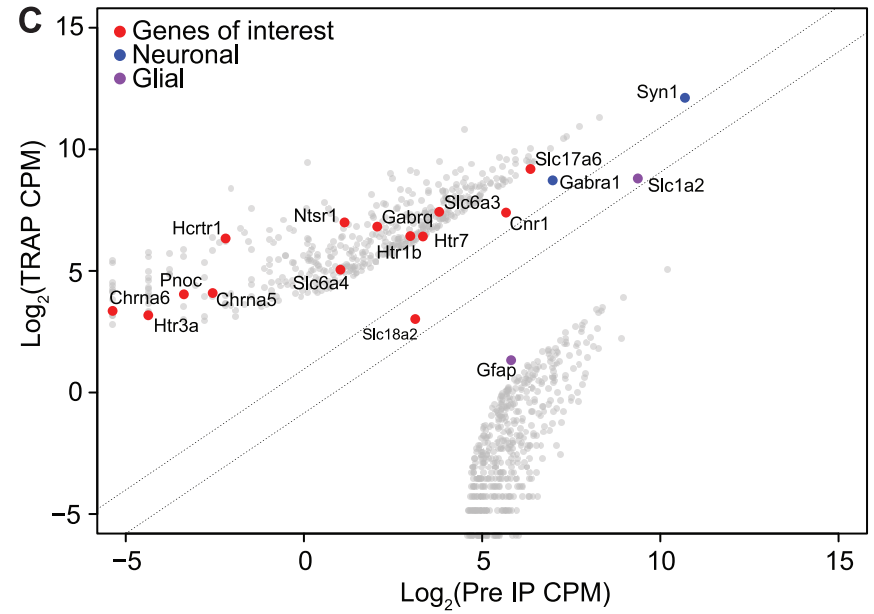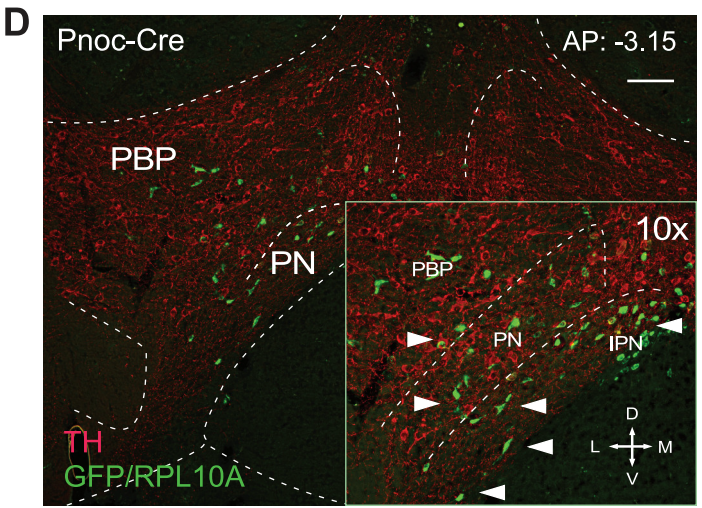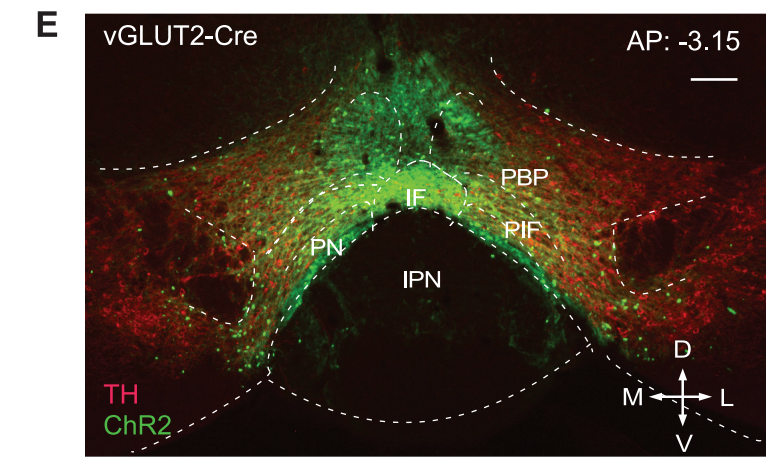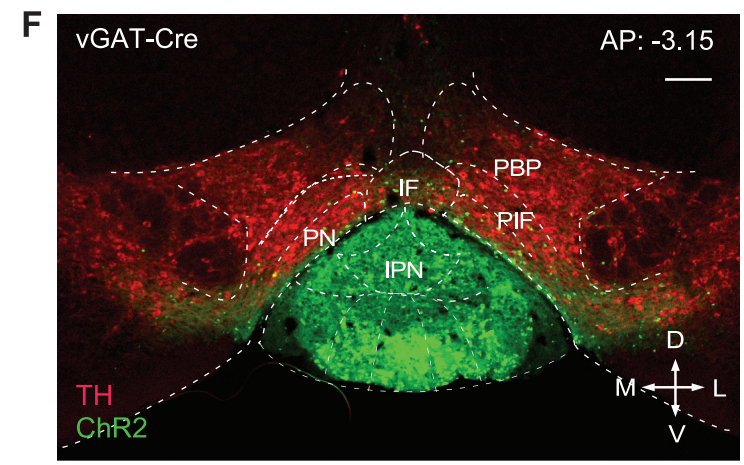

Supplement: NIHMS1533128-supplement-6.pdf [file NIHMS1533128-supplement-6.pdf]

**A** *In situ* hybridization

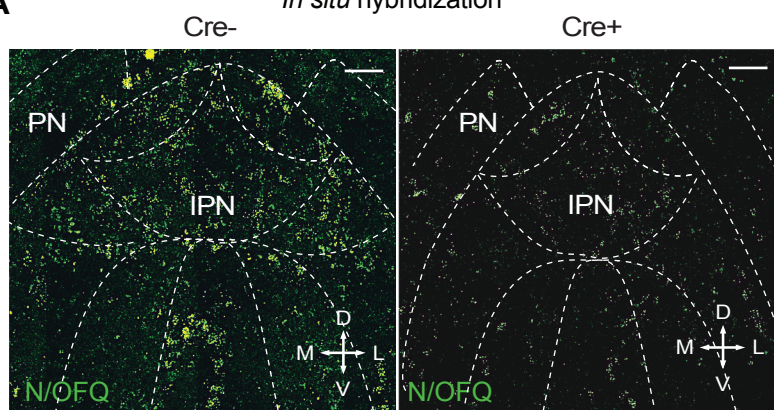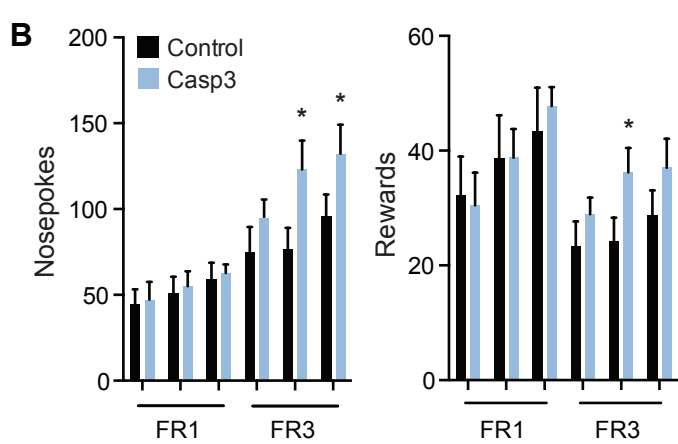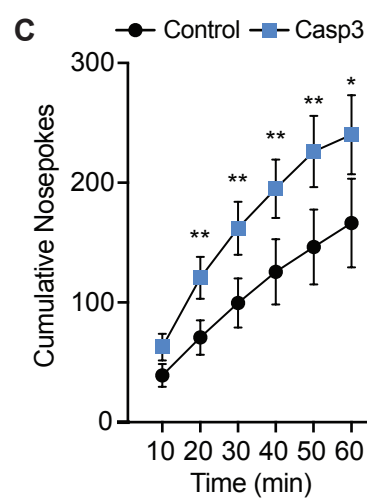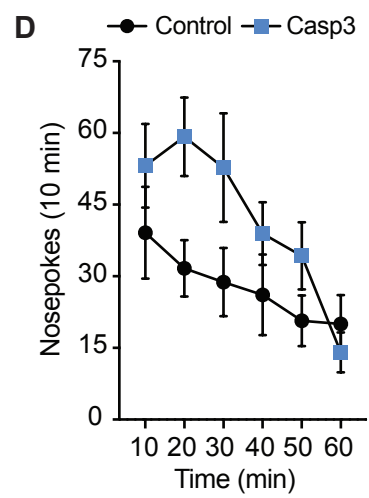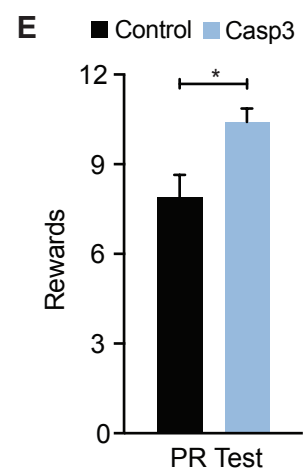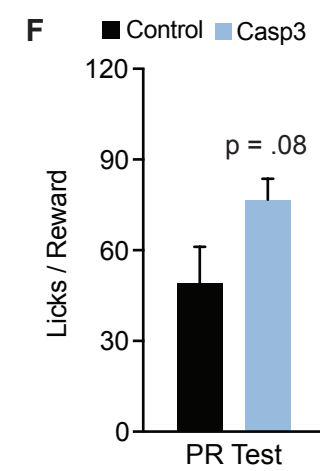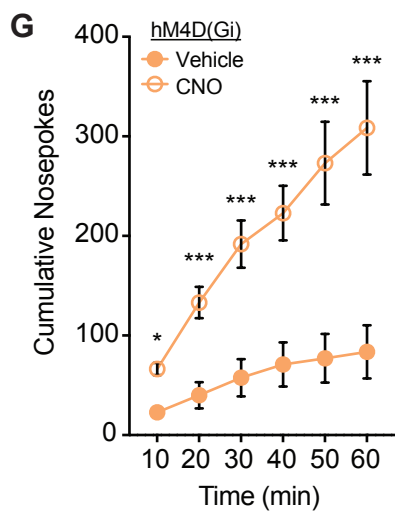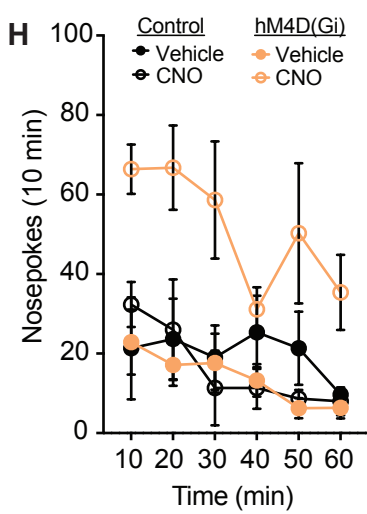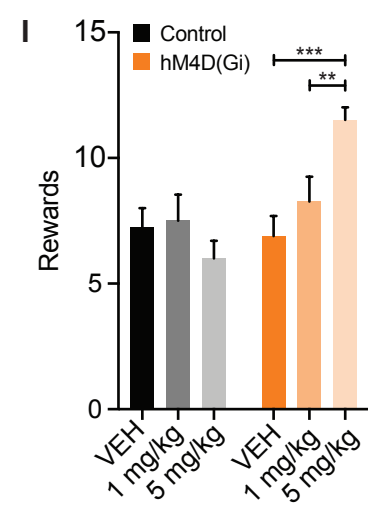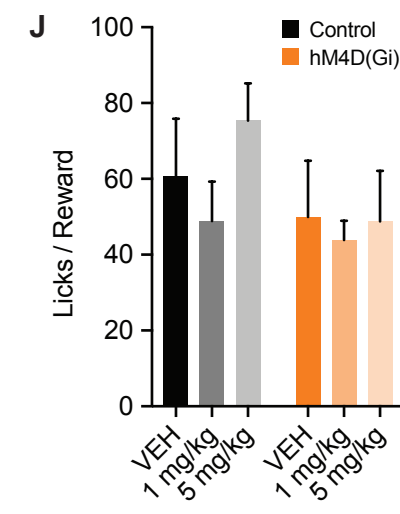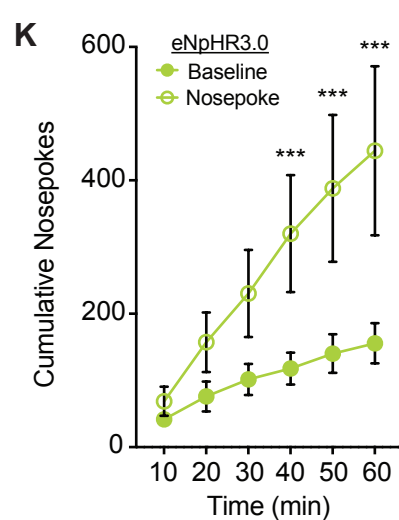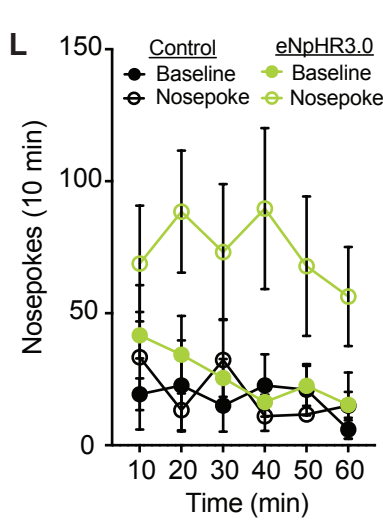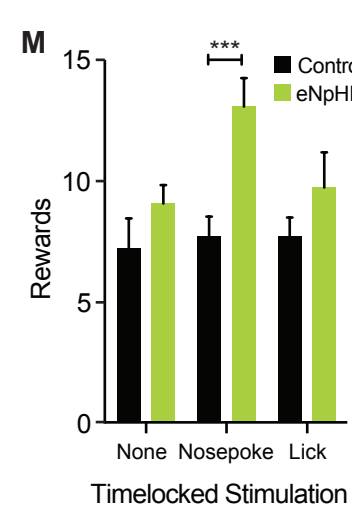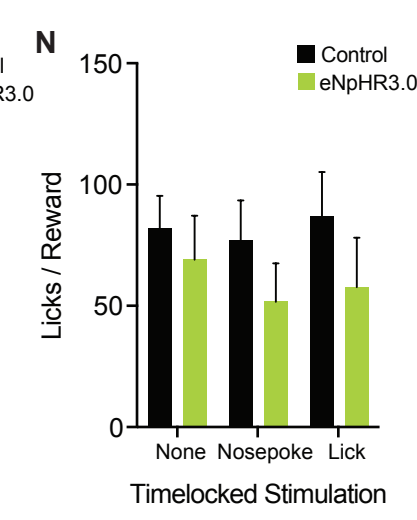

Supplement: NIHMS1533128-supplement-7.pdf [file NIHMS1533128-supplement-7.pdf]

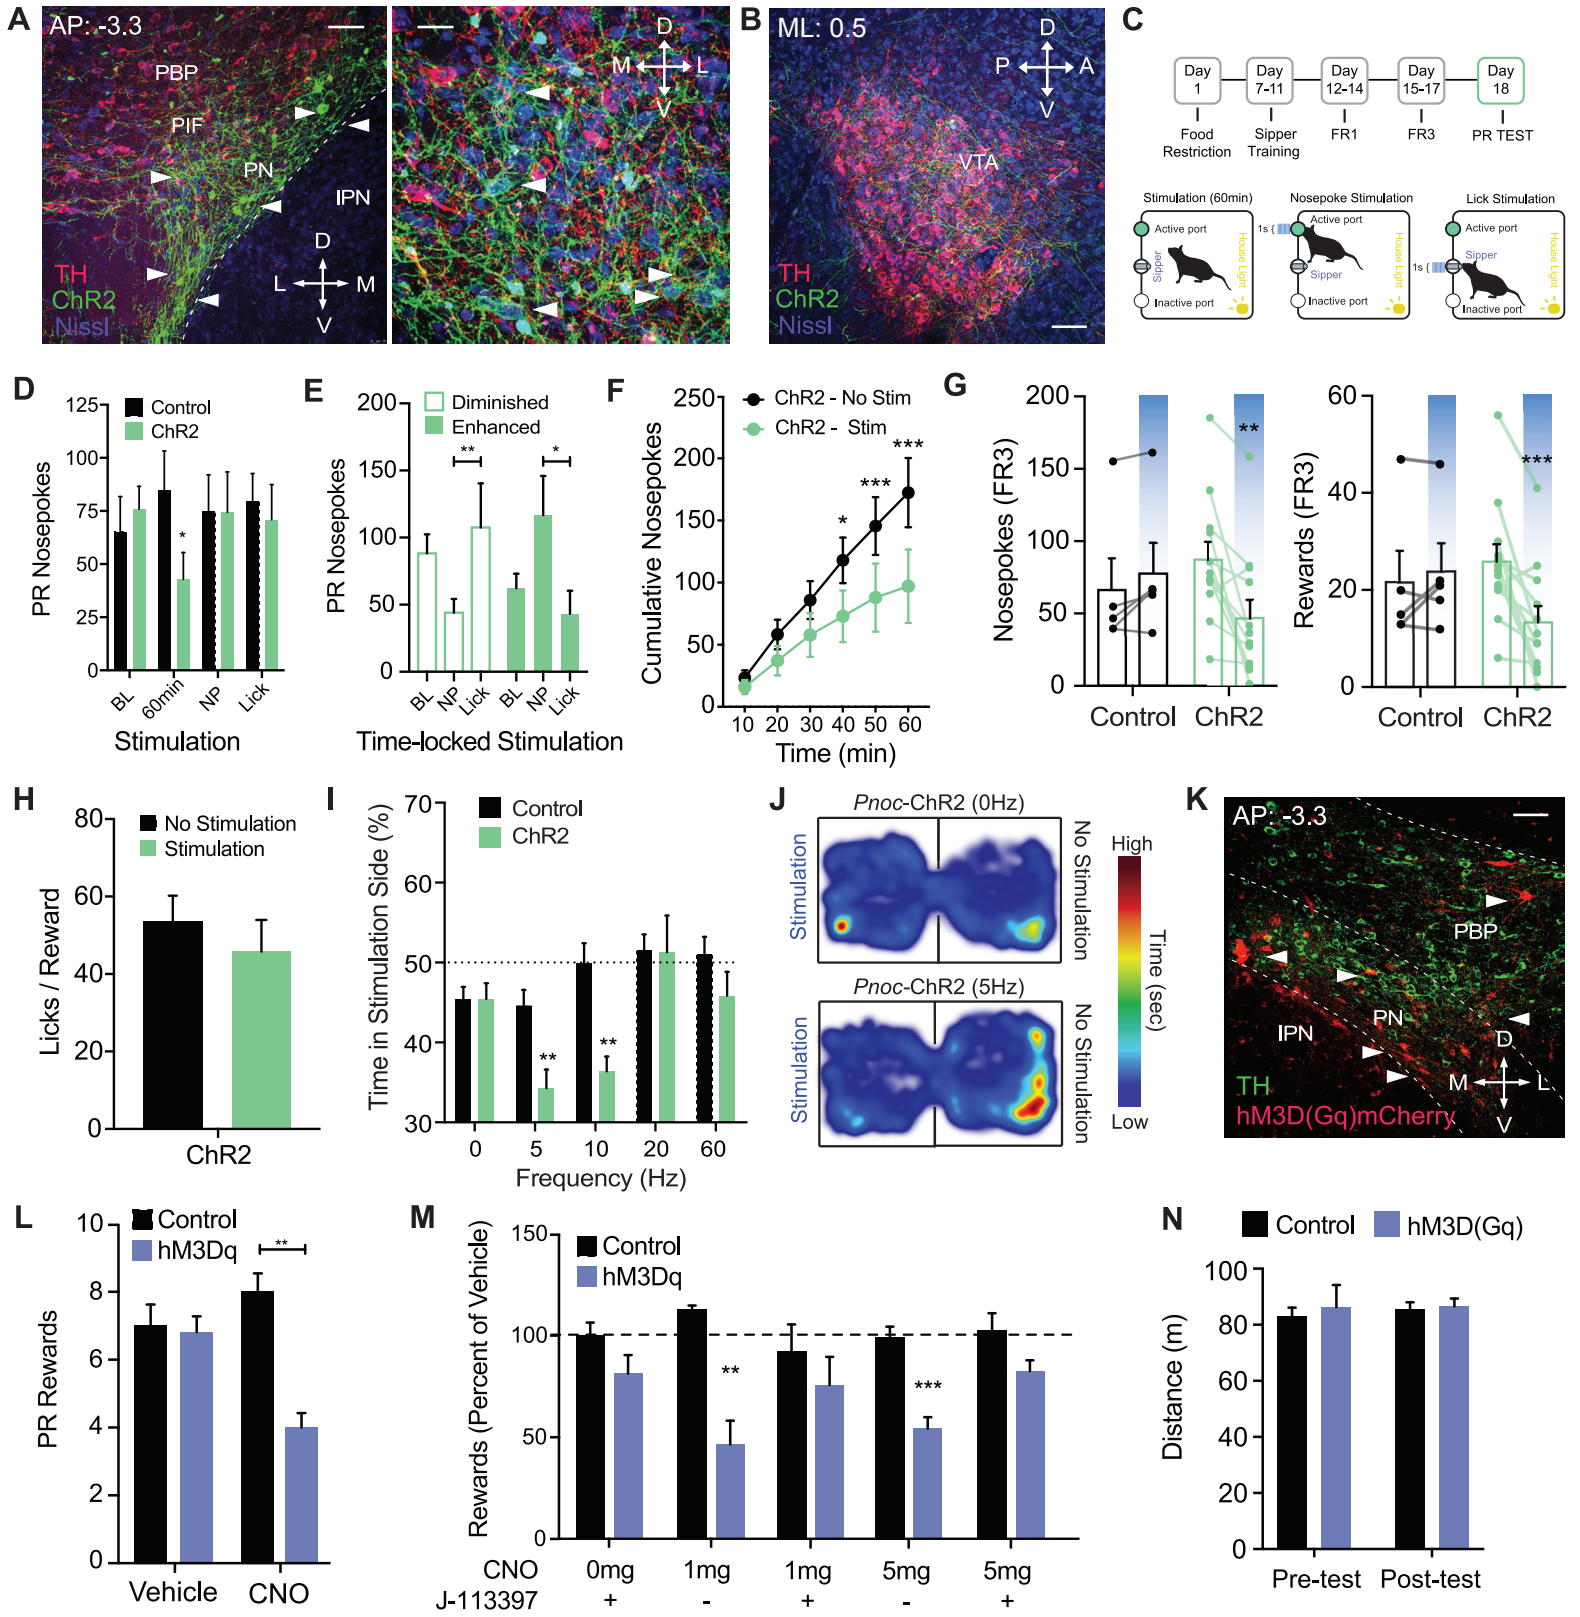

Supplement: NIHMS1533128-supplement-8.pdf [file NIHMS1533128-supplement-8.pdf]

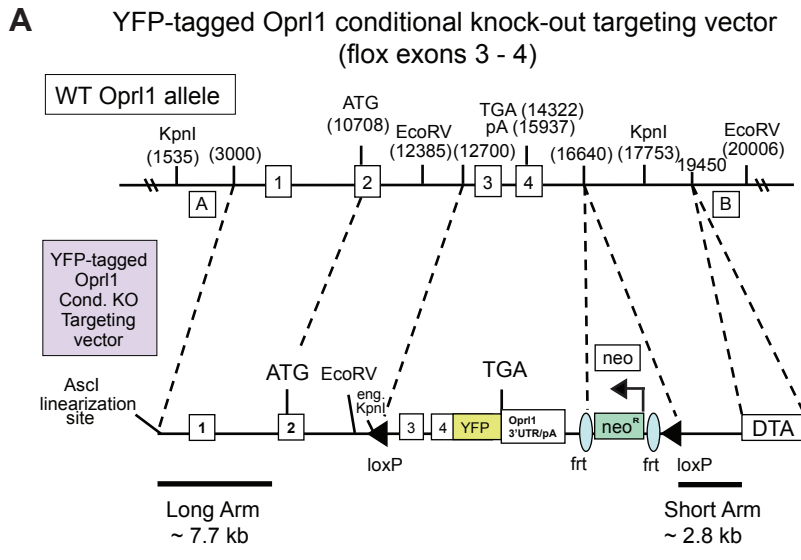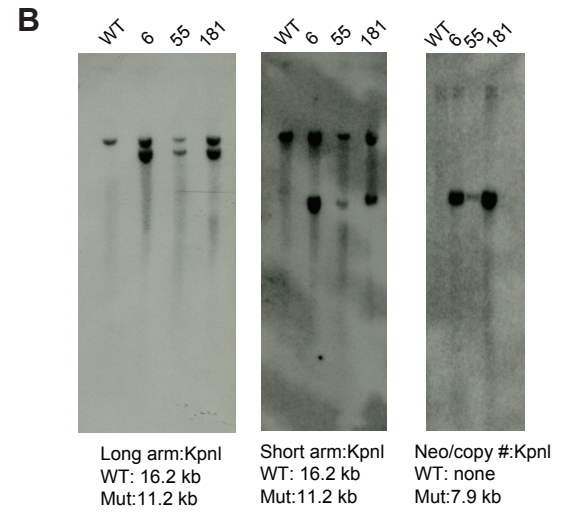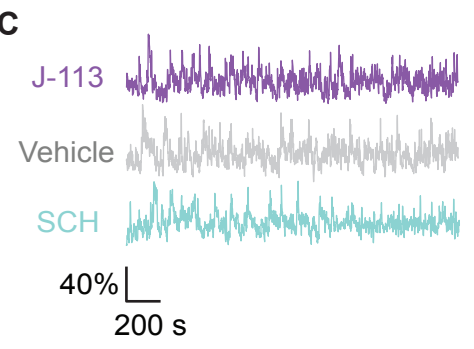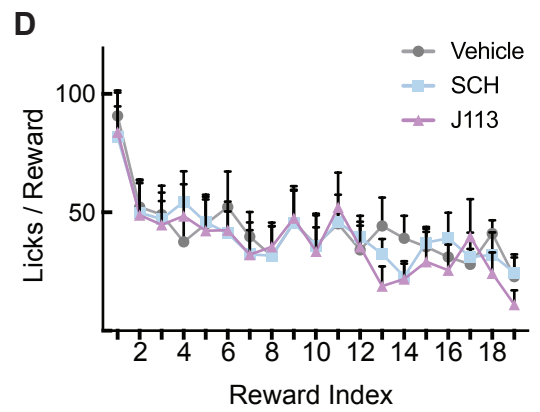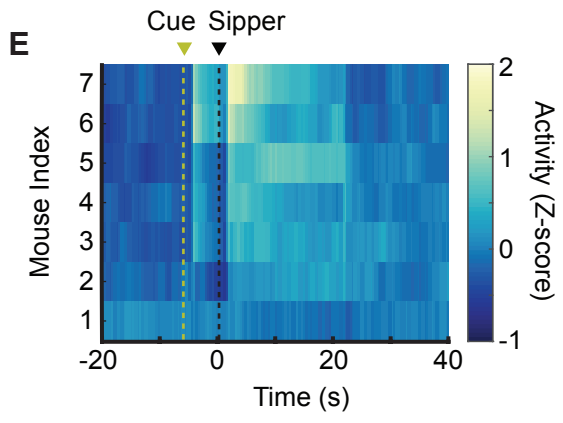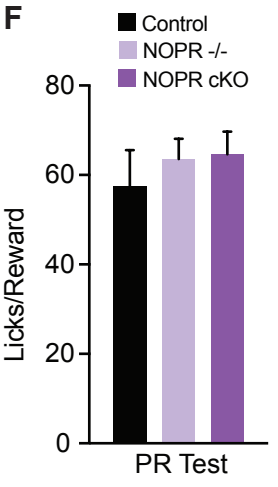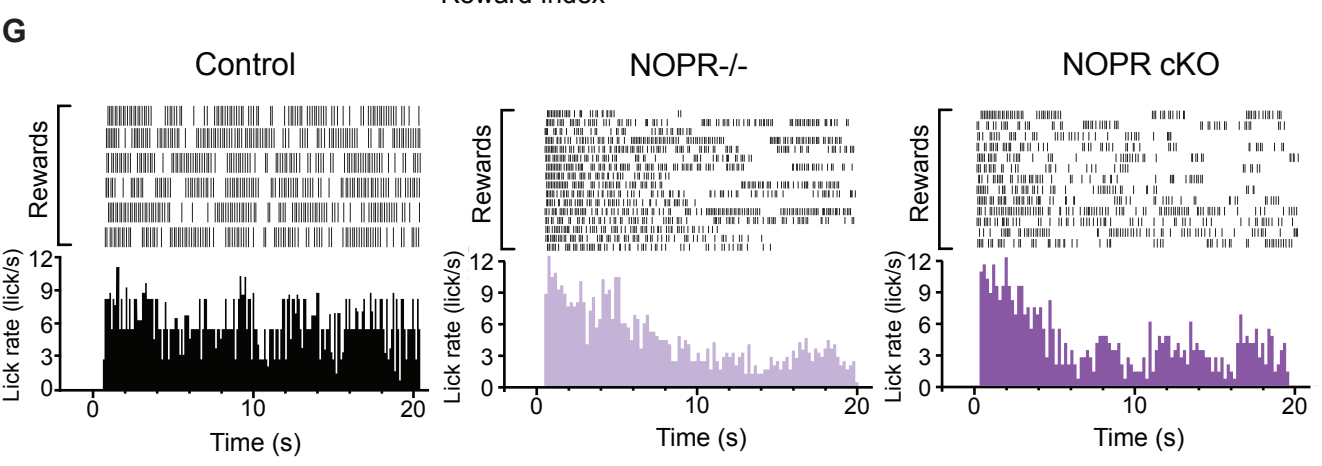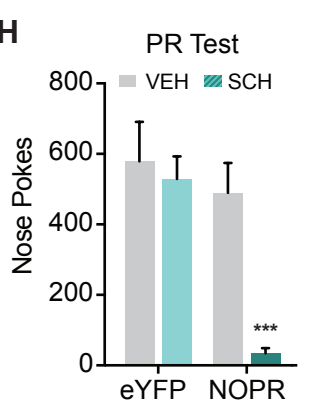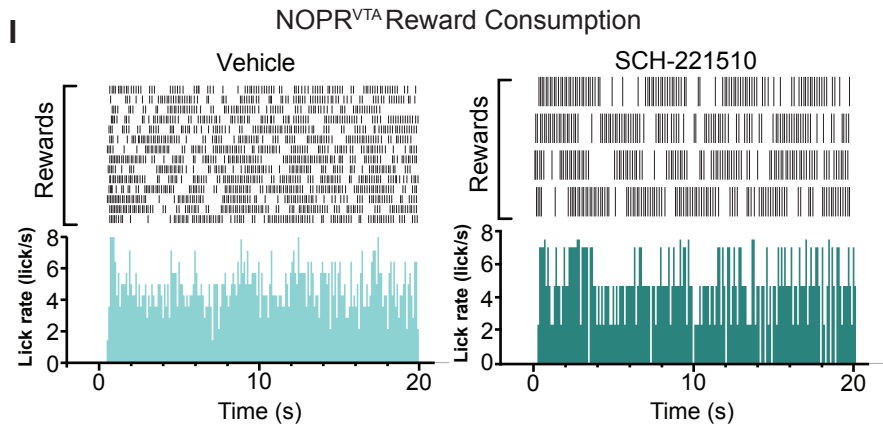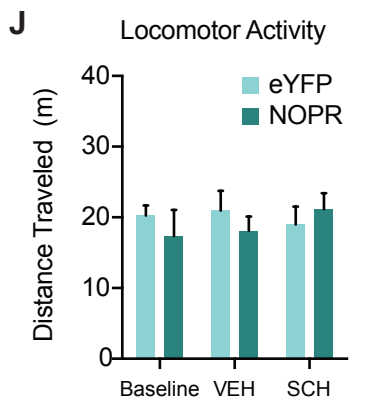

Supplement: NIHMS1533128-supplement-9.pdf [file NIHMS1533128-supplement-9.pdf]
